# Supplementary material for: Bayesian nonparametric method for genetic dissection of brain activation region
Source: Frontiers journal article supplement (doi:10.3389/fnins.2023.1235321), 2023-10-18
Supplement: Data_Sheet_1.pdf [file Data_Sheet_1.pdf]

# Supplementary Material for “Bayesian nonparametric method for genetic dissection of brain activation region” by Jin, Kang and Yu

## 1 DERIVATION OF POSTERIOR COMPUTATION

### 1.1 Bayesian Level Set Methods with Spike-and-Slab Prior

Let  $\mathbf{Y} = (\mathbf{y}_1, \dots, \mathbf{y}_n)^T$  be the signal matrix. Let  $\boldsymbol{\sigma}^2 = (\sigma_1^2, \dots, \sigma_n^2)$  and  $\boldsymbol{\tau}^2 = (\tau_1^2, \dots, \tau_m^2)$ . The joint posterior distribution is given by

$$\begin{aligned} \pi(\boldsymbol{\beta}, \boldsymbol{\mu}, \boldsymbol{\sigma}^2, \boldsymbol{\eta}, \boldsymbol{\gamma}, \boldsymbol{\tau}^2, \tau_\nu^2, w \mid \mathbf{Y}) \\ \propto \pi(\mathbf{Y} \mid \boldsymbol{\beta}, \boldsymbol{\mu}, \boldsymbol{\sigma}^2) \pi(\boldsymbol{\beta}) \pi(\boldsymbol{\sigma}^2) \pi(\boldsymbol{\mu} \mid \boldsymbol{\eta}, \boldsymbol{\tau}^2) \pi(\boldsymbol{\eta} \mid \boldsymbol{\gamma}, \boldsymbol{\tau}^2) \pi(\boldsymbol{\gamma} \mid w) \pi(\boldsymbol{\tau}^2) \pi(\tau_\nu^2) \pi(w) \end{aligned}$$

The full conditional posterior distributions of all the parameters in the Metropolis-Hasting (RMMALA) within Gibbs sampling are derived as follows.

First, we derive the RMMALA algorithm to update  $\boldsymbol{\beta}$  given all other parameters. The log full conditional density of  $\boldsymbol{\beta}$  is given by

$$\begin{aligned} \pi(\boldsymbol{\beta} \mid \bullet) &\propto \pi(\mathbf{Y} \mid \boldsymbol{\beta}, \boldsymbol{\mu}, \boldsymbol{\sigma}^2) \pi(\boldsymbol{\beta}) \\ &\propto \exp \left\{ -\frac{1}{2} \left[ \sum_{i=1}^q \frac{1}{\sigma_i^2} (\mathbf{y}_i - \mu_i \mathbf{H}_\epsilon(\boldsymbol{\beta}))^T (\mathbf{y}_i - \mu_i \mathbf{H}_\epsilon(\boldsymbol{\beta})) + \boldsymbol{\beta}^T \boldsymbol{\Lambda}^{-1} \boldsymbol{\beta} \right] \right\} \end{aligned}$$

Then log full conditional distribution of  $\boldsymbol{\beta}$  is given by

$$\mathcal{L}(\boldsymbol{\beta}) = \log[\pi(\boldsymbol{\beta} \mid \bullet)] = C - \frac{1}{2} \left[ \sum_{i=1}^q \frac{1}{\sigma_i^2} \sum_{j=1}^p \left( y_{ij} - \mu_i H_\epsilon \left[ \sum_{l=1}^L \beta_l \psi_{l,j} \right] \right)^2 + \sum_{l=1}^L \frac{\beta_l^2}{\lambda_l} \right],$$

and

$$\begin{aligned} \frac{\partial \mathcal{L}}{\partial \beta_l} &= \sum_{i=1}^q \sum_{j=1}^p \frac{\mu_i}{\sigma_i^2} \psi_{l,j} H_\epsilon^{(1)} \left[ \boldsymbol{\psi}_j^T \boldsymbol{\beta} \right] \left( y_{ij} - \mu_i H_\epsilon \left[ \boldsymbol{\psi}_j^T \boldsymbol{\beta} \right] \right) - \frac{\beta_l}{\lambda_l} \\ \frac{\partial^2 \mathcal{L}}{\partial \beta_l^2} &= \sum_{i=1}^q \sum_{j=1}^p \left\{ \frac{\mu_i}{\sigma_i^2} \psi_{l,j}^2 H_\epsilon^{(2)} \left[ \boldsymbol{\psi}_j^T \boldsymbol{\beta} \right] \left( y_{ij} - \mu_i H_\epsilon \left[ \boldsymbol{\psi}_j^T \boldsymbol{\beta} \right] \right) - \frac{\mu_i^2}{\sigma_i^2} \psi_{l,j}^2 H_\epsilon^{2(1)} \left[ \boldsymbol{\psi}_j^T \boldsymbol{\beta} \right] \right\} - \frac{1}{\lambda_l} \\ \frac{\partial^2 \mathcal{L}}{\partial \beta_l \partial \beta_k} &= \sum_{i=1}^q \sum_{j=1}^p \left\{ \frac{\mu_i}{\sigma_i^2} \psi_{l,j} \psi_{k,j} \mu_i H_\epsilon^{(2)} \left[ \boldsymbol{\psi}_j^T \boldsymbol{\beta} \right] \left( y_{ij} - \mu_i H_\epsilon \left[ \boldsymbol{\psi}_j^T \boldsymbol{\beta} \right] \right) - \frac{\mu_i^2}{\sigma_i^2} \psi_{l,j} \psi_{k,j} H_\epsilon^{2(1)} \left[ \boldsymbol{\psi}_j^T \boldsymbol{\beta} \right] \right\}, \quad l \neq k \end{aligned}$$

This further implies that

$$\begin{aligned}
 \nabla_{\beta} \mathcal{L}(\beta) &= \sum_{i=1}^q \frac{\mu_i}{\sigma_i^2} \sum_{j=1}^p (y_{ij} - \mu_i H_j) H_j^{(1)} \psi_j - \Lambda^{-1} \beta \\
 &= \left( \frac{\boldsymbol{\mu}}{\boldsymbol{\sigma}^2} \right)^T \left( Y_{q \times p} - \boldsymbol{\mu}_{q \times 1} H_{\epsilon}^T \left[ \boldsymbol{\psi}_j^T \boldsymbol{\beta} \right]_{1 \times p} \right) \text{diag}(H_{p \times 1}^{(1)})_{p \times p} \boldsymbol{\psi}_j - \Lambda^{-1} \beta, \\
 \mathbf{G}(\beta) &= \{g_{l,k}(\beta)\}_{L \times L},
 \end{aligned}$$

where

$$\begin{aligned}
 g_{l,l}(\beta) &= -E\left[\frac{\partial^2 g}{\partial \beta_l^2}\right] = \sum_{i=1}^q \sum_{j=1}^p \frac{\mu_i^2}{\sigma_i^2} \psi_{l,j}^2 H_{\epsilon}^{2(1)} \left[ \boldsymbol{\psi}_j^T \boldsymbol{\beta} \right] + \frac{1}{\lambda_l} \\
 g_{l,k}(\beta) &= -E\left[\frac{\partial^2 g}{\partial \beta_l \partial \beta_k}\right] = \sum_{i=1}^q \sum_{j=1}^p \frac{\mu_i^2}{\sigma_i^2} \psi_{l,j} \psi_{k,j} H_{\epsilon}^{2(1)} \left[ \boldsymbol{\psi}_j^T \boldsymbol{\beta} \right].
 \end{aligned}$$

Thus, the proposal distribution for  $\beta$  of the RMMALA is given by

$$\beta^* \sim N \left[ \beta + \frac{\Delta^2}{2} \mathbf{G}^{-1}(\beta) \nabla_{\beta} \mathcal{L}(\beta), \Delta^2 \mathbf{G}^{-1}(\beta) \right],$$

Next, we derive the Gibbs sampler to update all other algorithms. The full conditional of  $\boldsymbol{\mu}$  is given by

$$\begin{aligned}
 \pi(\boldsymbol{\mu} \mid \bullet) &\propto \pi(\mathbf{Y} \mid \boldsymbol{\beta}, \boldsymbol{\mu}, \boldsymbol{\sigma}^2) \pi(\boldsymbol{\mu} \mid \boldsymbol{\eta}, \tau_{\mu}^2) \\
 &\propto \exp \left\{ -\frac{1}{2} \left[ \sum_{i=1}^q \frac{1}{\sigma_i^2} (\mathbf{y}_i - \mu_i \mathbf{H}_{\epsilon}(\boldsymbol{\beta}))^T (\mathbf{y}_i - \mu_i \mathbf{H}_{\epsilon}(\boldsymbol{\beta})) + \sum_{i=1}^q \frac{1}{\tau_{\mu}^2} (\mu_i - \mathbf{S}_i \boldsymbol{\eta})^2 \right] \right\} \\
 &\propto \exp \left\{ -\frac{1}{2} \left[ \sum_{i=1}^q \left( \frac{1}{\sigma_i^2} \sum_{j=1}^p H_j^2 + \frac{1}{\tau_{\mu}^2} \right) \mu_i^2 - 2 \left( \frac{1}{\sigma_i^2} \sum_{j=1}^p H_j y_{ij} + \frac{1}{\tau_{\mu}^2} \sum_{k=1}^m S_{ik} \eta_k \right) \mu_i \right] \right\}
 \end{aligned}$$

This implies that we can update each  $\mu_i$  by sampling from

$$[\mu_i \mid \bullet] \sim N \left[ \left( \frac{1}{\sigma_i^2} \sum_{j=1}^p H_j^2 + \frac{1}{\tau_{\mu}^2} \right)^{-1} \left( \frac{1}{\sigma_i^2} \sum_{j=1}^p H_j y_{ij} + \frac{1}{\tau_{\mu}^2} \sum_{k=1}^m S_{ik} \eta_k \right), \left( \frac{1}{\sigma_i^2} \sum_{j=1}^p H_j^2 + \frac{1}{\tau_{\mu}^2} \right)^{-1} \right]$$

The full conditional of  $\sigma^2$  is given by

$$\begin{aligned}\pi(\sigma^2 | \bullet) &\propto \pi(\mathbf{Y} | \boldsymbol{\beta}, \boldsymbol{\mu}, \sigma^2) \pi(\sigma^2) \\ &\propto \prod_{i=1}^q \frac{1}{\sigma_i^p} \exp \left\{ -\frac{1}{2\sigma_i^2} (\mathbf{y}_i - \mu_i \mathbf{H})^T (\mathbf{y}_i - \mu_i \mathbf{H}) \right\} \times \frac{1}{\sigma_i^{2a_1+2}} \exp \left\{ -\frac{a_2}{\sigma_i^2} \right\} \\ &\propto \prod_{i=1}^q \frac{1}{\sigma_i^{2a_1+p+2}} \exp \left\{ -\frac{a_2 + \sum_{j=1}^p (y_{ij} - \mu_i H_j)^2 / 2}{\sigma_i^2} \right\}\end{aligned}$$

This implies that we can update each  $\sigma_i^2$  by sampling from

$$[\sigma_i^2 | \bullet] \sim \text{IG} \left[ a_1 + \frac{p}{2}, a_2 + \frac{1}{2} \sum_{j=1}^p (y_{ij} - \mu_i H_j)^2 \right]$$

The full conditional distribution of  $\boldsymbol{\eta}$  is given by

$$\begin{aligned}\pi(\boldsymbol{\eta} | \bullet) &\propto \pi(\boldsymbol{\mu} | \boldsymbol{\eta}, \tau_\mu^2) \pi(\boldsymbol{\eta} | \boldsymbol{\gamma}, \boldsymbol{\tau}^2) \\ &\propto \exp \left\{ -\frac{1}{2\tau_\mu^2} (\boldsymbol{\mu} - \mathbf{S}\boldsymbol{\eta})^T (\boldsymbol{\mu} - \mathbf{S}\boldsymbol{\eta}) - \frac{1}{2} \boldsymbol{\eta}^T \boldsymbol{\Gamma}^{-1} \boldsymbol{\eta} \right\} \\ &\propto \exp \left\{ -\frac{1}{2} \left[ \boldsymbol{\eta}^T \left( \frac{1}{\tau_\mu^2} \mathbf{S}^T \mathbf{S} + \boldsymbol{\Gamma}^{-1} \right) \boldsymbol{\eta} - 2 \left( \frac{\boldsymbol{\mu}^T \mathbf{S}}{\tau_\mu^2} \right) \boldsymbol{\eta} \right] \right\}\end{aligned}$$

This implies that we can update  $\boldsymbol{\eta}$  by sampling

$$[\boldsymbol{\eta} | \bullet] \sim \text{N} \left[ \left( \frac{1}{\tau_\mu^2} \mathbf{S}^T \mathbf{S} + \boldsymbol{\Gamma}^{-1} \right)^{-1} \frac{\boldsymbol{\mu}^T \mathbf{S}}{\tau_\mu^2}, \left( \frac{1}{\tau_\mu^2} \mathbf{S}^T \mathbf{S} + \boldsymbol{\Gamma}^{-1} \right)^{-1} \right]$$

The full conditional distribution of  $\boldsymbol{\gamma}$  is given by

$$\begin{aligned}\pi(\boldsymbol{\gamma} | \bullet) &\propto \pi(\boldsymbol{\eta} | \boldsymbol{\gamma}, \boldsymbol{\tau}^2) \pi(\boldsymbol{\gamma} | w) \\ &\propto \prod_{k=1}^m \left[ \frac{\omega_{0,k}}{\omega_{0,k} + \omega_{1,k}} \delta_{\nu_0} + \frac{\omega_{1,k}}{\omega_{0,k} + \omega_{1,k}} \delta_1 \right],\end{aligned}$$

where  $\omega_{0,k} = (1 - w) \nu_0^{-1/2} \exp \left( -\frac{\eta_k^2}{2\nu_0 \tau_k^2} \right)$  and  $\omega_{1,k} = w \exp \left( -\frac{\eta_k^2}{2\tau_k^2} \right)$ .

We can update each  $\gamma_k$  by sampling from

$$[\gamma_k | \bullet] \sim \frac{\omega_{0,k}}{\omega_{0,k} + \omega_{1,k}} \delta_{\nu_0} + \frac{\omega_{1,k}}{\omega_{0,k} + \omega_{1,k}} \delta_1.$$

The full conditional of  $\tau^2$  is given by

$$\begin{aligned}\pi(\tau^2 \mid \bullet) &\propto \pi(\boldsymbol{\eta} \mid \boldsymbol{\gamma}, \tau^2) \pi(\tau^2) \\ &\propto \prod_{k=1}^m \frac{1}{\tau_k} \exp \left\{ -\frac{\eta_k^2}{2\tau_k^2 \gamma_k} \right\} \times \frac{1}{\tau_k^{2c_1+2}} \exp \left\{ -\frac{c_2}{\tau_k^2} \right\} \\ &\propto \prod_{k=1}^m \frac{1}{\tau_k^{2c_1+3}} \exp \left\{ -\frac{c_2 + \eta_k^2/2\gamma_k}{\tau_k^2} \right\}.\end{aligned}$$

This implies that we can update each  $\tau_k^2$  by sampling

$$[\tau_k^2 \mid \bullet] \sim \text{IG} \left[ c_1 + \frac{1}{2}, c_2 + \frac{\eta_k^2}{2\gamma_k} \right].$$

The full conditional of  $w$  is given by

$$\begin{aligned}\pi(w \mid \bullet) &\propto \pi(\boldsymbol{\gamma} \mid w) \pi(w) \\ &\propto \prod_{k=1}^m [(1-w)I[\gamma_k = \nu_0] + wI[\gamma_k = 1]] \\ &\propto w^{\sum_{k=1}^m I[\gamma_k = 1]} (1-w)^{\sum_{k=1}^m I[\gamma_k = \nu_0]}.\end{aligned}$$

We update from

$$[w \mid \bullet] \sim \text{Beta} \left[ 1 + \sum_{k=1}^m I[\gamma_k = 1], 1 + \sum_{k=1}^m I[\gamma_k = \nu_0] \right].$$

The full conditional of  $\tau_\mu^2$  is given by

$$\begin{aligned}\pi(\tau_\mu^2 \mid \bullet) &\propto \pi(\boldsymbol{\mu} \mid \boldsymbol{\eta}, \tau_\mu^2) \pi(\tau_\mu^2) \\ &\propto \frac{1}{\tau_\mu^q} \exp \left\{ -\frac{1}{2\tau_\mu^2} (\boldsymbol{\mu} - \mathbf{S}\boldsymbol{\eta})^T (\boldsymbol{\mu} - \mathbf{S}\boldsymbol{\eta}) \right\} \times \frac{1}{\tau_\mu^{2b_1+2}} \exp \left\{ -\frac{b_2}{\tau_\mu^2} \right\} \\ &\propto \frac{1}{\tau_\mu^{2b_1+q+2}} \exp \left\{ -\frac{b_2 + (\boldsymbol{\mu} - \mathbf{S}\boldsymbol{\eta})^T (\boldsymbol{\mu} - \mathbf{S}\boldsymbol{\eta}) / 2}{\tau_\mu^2} \right\}.\end{aligned}$$

Thus we sample from

$$[\tau_\mu^2 \mid \bullet] \sim \text{IG} \left[ b_1 + \frac{q}{2}, b_2 + \frac{\sum_{i=1}^q (\mu_i - \mathbf{S}_i \boldsymbol{\eta})^T (\mu_i - \mathbf{S}_i \boldsymbol{\eta})}{2} \right].$$

## 1.2 Bayesian Level Set Methods with Normal Prior (Non Sparse Prior)

We also consider a conjugate normal prior on  $\boldsymbol{\eta}$  without imposing sparsity which leads to more efficient posterior computation. The model is represented as

$$\begin{aligned} y_i \mid \boldsymbol{\beta}, \mu_i, \sigma_i^2 &\sim N_p [\mu_i \mathbf{H}_\epsilon(\boldsymbol{\beta}), \sigma_i^2 \mathbf{I}_p], \quad \boldsymbol{\beta} \sim N_L [\mathbf{0}, \boldsymbol{\Lambda}_L], \\ \boldsymbol{\mu} &\sim N_q[\mathbf{S}^T \boldsymbol{\eta}, \tau_\mu^2 \mathbf{I}_q], \quad \boldsymbol{\eta} \sim N_m[\mathbf{0}, \tau_\eta^2 \mathbf{I}_m], \\ \sigma_i^2 &\sim \text{IG}[a_1, a_2], \quad \tau_\mu^2 \sim \text{IG}[b_1, b_2], \quad \tau_\eta^2 \sim \text{IG}[d_1, d_2]. \end{aligned}$$

The posterior computation algorithm for updating all other parameters remain the same except for  $\boldsymbol{\eta}$  and  $\tau_\eta^2$ , although we still use the Gibbs sampler to update these two parameters. We derive their full conditional distributions as follows.

The full conditional distribution of  $\boldsymbol{\eta}$  is given by

$$\begin{aligned} \pi(\boldsymbol{\eta} \mid \bullet) &\propto \pi(\boldsymbol{\mu} \mid \boldsymbol{\eta}, \tau_\mu^2) \pi(\boldsymbol{\eta} \mid \tau_\eta^2) \\ &\propto \exp \left\{ -\frac{1}{2\tau_\mu^2} (\boldsymbol{\mu} - \mathbf{S}\boldsymbol{\eta})^T (\boldsymbol{\mu} - \mathbf{S}\boldsymbol{\eta}) - \frac{1}{2\tau_\eta^2} \boldsymbol{\eta}^T \boldsymbol{\eta} \right\} \\ &\propto \exp \left\{ -\frac{1}{2} \left[ \boldsymbol{\eta}^T \left( \frac{1}{\tau_\mu^2} \mathbf{S}^T \mathbf{S} + \frac{1}{\tau_\eta^2} \mathbf{I}_m \right) \boldsymbol{\eta} - 2 \left( \frac{\boldsymbol{\mu}^T \mathbf{S}}{\tau_\mu^2} \right) \boldsymbol{\eta} \right] \right\}. \end{aligned}$$

This implies that we can update  $\boldsymbol{\eta}$  by sampling

$$[\boldsymbol{\eta} \mid \bullet] \sim N \left[ \left( \frac{1}{\tau_\mu^2} \mathbf{S}^T \mathbf{S} + \frac{1}{\tau_\eta^2} \mathbf{I}_m \right)^{-1} \frac{\boldsymbol{\mu}^T \mathbf{S}}{\tau_\mu^2}, \left( \frac{1}{\tau_\mu^2} \mathbf{S}^T \mathbf{S} + \frac{1}{\tau_\eta^2} \mathbf{I}_m \right)^{-1} \right].$$

The full conditional of  $\tau_\eta^2$  is given by

$$\begin{aligned} \pi(\tau_\eta^2 \mid \bullet) &\propto \pi(\boldsymbol{\eta} \mid \tau_\eta^2) \pi(\tau_\eta^2) \\ &\propto \frac{1}{\tau_\eta^m} \exp \left\{ -\frac{1}{2\tau_\eta^2} \boldsymbol{\eta}^T \boldsymbol{\eta} \right\} \times \frac{1}{\tau_\eta^{2d_1+2}} \exp \left\{ -\frac{d_2}{\tau_\eta^2} \right\} \\ &\propto \frac{1}{\tau_\eta^{2d_1+m+2}} \exp \left\{ -\frac{d_2 + \boldsymbol{\eta}^T \boldsymbol{\eta}/2}{\tau_\eta^2} \right\}. \end{aligned}$$

Thus we sample from

$$[\tau_\eta^2 \mid \bullet] \sim \text{IG} \left[ d_1 + \frac{m}{2}, d_2 + \frac{\sum_{k=1}^m \eta_k^2}{2} \right].$$
